# Supplementary material
Source: PubMed Central journal article supplement (PMC7859027)
Supplement: 13613_2021_815_MOESM2_ESM.pdf [file 13613_2021_815_MOESM2_ESM.pdf]

| <b>Austria</b>      |                           |                                              |                                                    |              |
|---------------------|---------------------------|----------------------------------------------|----------------------------------------------------|--------------|
| <b>AT</b>           | Michael Joannidis         | Medical University Innsbruck                 | Division Of Intensive Care And Emergency Medicine, | Innsbruck    |
| <b>AT</b>           | Philipp Eller             | Medical University Graz                      | Allgemeine Medizin Intensivstation                 | Graz         |
| <b>AT</b>           | Raimund Helbok            | Medical University Of Innsbruck              | Department Of Neurology, Neurocritical Care Unit   | Innsbruck    |
| <b>AT</b>           | René Schmutz              | Hospital Of St. John Of God                  | Icu B5                                             | Vienna       |
| <b>Denmark</b>      |                           |                                              |                                                    |              |
| <b>DK</b>           | Anders Bastiansen         | Bispebjerg Hospital                          | Intensiv Terapi Afsnit                             | Copenhagen   |
| <b>DK</b>           | Christoffer Sølling       | Viborg Regional Hospital                     | Department Of Anaesthesiology And Intensive Care   | Viborg       |
| <b>DK</b>           | Thomas Elkmann            | Aarhus University Hospital                   | Intensive Care North                               | Aarhus       |
| <b>England (GB)</b> |                           |                                              |                                                    |              |
| <b>EN</b>           | Agnieszka Kubisz-Pudelko  | Yeovil District Hospital                     | Intensive Care Unit                                | Yeovil       |
| <b>EN</b>           | Alan Pope                 | Peterborough City Hospital                   | Critical Care Unit                                 | Peterborough |
| <b>EN</b>           | Amy Collins               | Queen Elizabeth Hospital                     | Critical Care Queen Elizabeth Hospital             | Edinburgh    |
| <b>EN</b>           | Ashok S. Raj              | Croydon University Hospital                  | Croydon University Hospital Icu                    | Croydon      |
| <b>EN</b>           | Carole Boulanger          | Royal Devon & Exeter Nhs Foundation Trust    | Intensive Care Unit                                | Exeter       |
| <b>EN</b>           | Ciaran Hart               | Maidstone                                    | Intensive Care/high Dependency                     | Maidstone    |
| <b>EN</b>           | Clare Bolger              | University Hospital Southampton              | General Intensive Care Unit                        | Southampton  |
| <b>EN</b>           | Georgina Randell          | Norfolk And Norwich University Hospital      | Critical Care Complex                              | Norwich      |
| <b>EN</b>           | Ingeborg D Welters        | Royal Liverpool University Hospital          | Intensive Care                                     | Liverpool    |
| <b>EN</b>           | Jason Cupitt              | Blackpool Victoria Hospital                  | General Critical Care Unit                         | Blackpool    |
| <b>EN</b>           | Jeremy Henning            | James Cook University Hospital               | Icu 2 And 2                                        | Midlesbrough |
| <b>EN</b>           | Joanne Jones              | Tunbridge Wells Hospital                     | Intensive Care Unit                                | Pembury      |
| <b>EN</b>           | Kiran Salaunkey           | Royal Papworth Hospital Nhs Foundation Trust | Icu                                                | Cambridge    |
| <b>EN</b>           | Laura Ortiz-Ruiz De Gordo | Royal Sussex County Hospital                 | Level 7                                            | Brighton     |

|           |                           |                                        |                                          |              |
|-----------|---------------------------|----------------------------------------|------------------------------------------|--------------|
| <b>EN</b> | Madhu Balasubramaniam     | Royal Bolton Hospital                  | Royal Bolton Critical Care               | Bolton       |
| <b>EN</b> | Marcela Vizcaychipi       | Chelsea And Westminster Hospital       | Adult Intensive Care Unit                | London       |
| <b>EN</b> | McDonald Mupudzi          | Hampshire Hospitals Foundation Trust   | Basingstoke And North Hampshire Hospital | Basingstoke  |
| <b>EN</b> | Michael Reay              | Russells Hall Hospital                 | Intensive Care Unit Russells Hall        | Dudley       |
| <b>EN</b> | Michael Spivey            | Royal Cornwall Hospital Trust          | Critical Care Unit                       | Cornwall     |
| <b>EN</b> | Nick Spittle Nick Spittle | Chesterfield Royal Hospital            | Intensive Care Unit                      | Chesterfield |
| <b>EN</b> | Nigel White               | Royal Bournemouth Hospital             | Bournemouth Critical Care Unit           | Bournemouth  |
| <b>EN</b> | Patricia Williams         | Dorset County                          | Icu Dch                                  | Dorchester   |
| <b>EN</b> | Patrick Morgan            | Surrey And Sussex Healthcare Nhs Trust | East Surrey Hospital                     | Redhill      |
| <b>EN</b> | Rachel Savine             | Royal Surrey County Hospital           | Royal Surrey                             | Guildford    |
| <b>EN</b> | Reni Jacob                | Wirral University Teaching Hospital    | Critical Care                            | Birkenhead   |
| <b>EN</b> | Richard Innes             | Musgrove Park Hospital                 | Critical Care Unit                       | Taunton      |
| <b>EN</b> | Tarkeshwari Mane          | North Tees University Hospital         | Critical Care Unit                       | Stockton     |
| <b>EN</b> | Waqas Khaliq              | University Hospital Lewisham           | Icu/hdu Lewisham                         | Lewisham     |

## France

|           |                      |                                       |                                           |             |
|-----------|----------------------|---------------------------------------|-------------------------------------------|-------------|
| <b>FR</b> | Bertrand Guidet      | Saint Antoine                         | Medecine Intensive Reanimation            | Paris       |
| <b>FR</b> | Didier Thevenin      | Ch Dr Schaffner                       | Reanimation Polyvalente                   | Lens        |
| <b>FR</b> | Guillaume Savary     | Hôpital Cochin                        | Médecine Intensive Réanimation            | Paris       |
| <b>FR</b> | Hervé Mentec         | Victor Dupouy                         | Service De Réanimation Polyvalente Et Usc | Argenteuil  |
| <b>FR</b> | Jean-Philippe Rigaud | Dieppe General Hospital               | Médecine Intensive Réanimation            | Dieppe      |
| <b>FR</b> | Julien Maizel        | Chu Amiens                            | Reanimaiton Medicale                      | Amiens      |
| <b>FR</b> | Kelly Tiercelet      | Groupe Hospitalier Paris Saint Joseph | Réanimation Polyvalente                   | Paris       |
| <b>FR</b> | Maud Mousset Hovaere | Ch Dax                                | Réanimation Polyvalente                   | Dax         |
| <b>FR</b> | Nathalie Rolin       | Groupe Hospitalier Sud Ile De France  | Département De Médecine Intensive         | Melun       |
| <b>FR</b> | Philippe Burtin      | Clinique Du Millenaire                | Reanimation Chirurgicale Ii Et Iii        | Montpellier |

|                |                             |                                               |                                                            |           |
|----------------|-----------------------------|-----------------------------------------------|------------------------------------------------------------|-----------|
| <b>FR</b>      | Saad Nseir                  | Chu Lille                                     | Critical Care Center                                       | Lille     |
| <b>Germany</b> |                             |                                               |                                                            |           |
| <b>DE</b>      | Christian Rabe              | Klinikum Rechts Der Isar Tu München           | Toxikologische Intensivstation                             | München   |
| <b>DE</b>      | Eberhard Barth              | University Hospital Ulm                       | Anesthesiologic Intensive Care Department                  | Ulm       |
| <b>DE</b>      | Kristina Fuest              | Klinikum Rechts Der Isar, School Of Medicine, | Intensivstation Is2/I2a                                    | München   |
| <b>DE</b>      | Michael Schuster            | Universitätsmedizin Der Johannes Gutenberg-   | Anästhesie-intensivstation                                 | Mainz     |
| <b>DE</b>      | Patrick Meybohm             | University Hospital Frankfurt                 | Department Of Anaesthesiology, Intensive Care Medicine And | Frankfurt |
| <b>DE</b>      | Sebastian Allgäuer          | Robert-bosch-krankenhaus                      | 1d                                                         | Stuttgart |
| <b>DE</b>      | Stefan J Schaller           | Klinikum Rechts Der Isar, School Of Medicine, | Intensivstation Is1 / M2b                                  | München   |
| <b>DE</b>      | Stefan Schering             | University Hospital Leipzig                   | Department Of Anesthesiology And Intensive Care Medicine   | Leipzig   |
| <b>DE</b>      | Stephan Steiner             | St Vincenz Hospital                           | Intensive Care Unit                                        | Limburg/l |
| <b>DE</b>      | Tobias Graf                 | Universitätsklinikum Schleswig-holstein       | Iki 12a                                                    | Lübeck    |
| <b>Greece</b>  |                             |                                               |                                                            |           |
| <b>GR</b>      | Aristeidis Vakalos          | Xanthi General Hospital                       | Xanthi Icu                                                 | Xanthi    |
| <b>GR</b>      | Elli Niki Fioni             | General Hospital Agios Pavlos                 | Icu Agios Pavlos                                           | Thessalo  |
| <b>GR</b>      | Evangelia Neou              | General Hospital Of Larissa                   | General Icu                                                | Larissa   |
| <b>GR</b>      | Georgios Papathanakos       | University Hospital Of Ioannina               | Intensive Care Unit                                        | Ioannina  |
| <b>GR</b>      | Ioannis Koutsodimitropoulos | General Hospital Of Eleusis Thriassio         | Icu Latsio                                                 | Eleusis   |
| <b>GR</b>      | Kounougeri Aikaterini       | Konstantopouleion Gen. Hospital               | General Icu                                                | Athens    |
| <b>GR</b>      | Nikoletta Rovina            | Sotiria Hospital                              | Icu 1st Department Of Pulmonary Medicine Athens Medical    | Athens    |
| <b>GR</b>      | Stylliani Kourelea          | General Hospital Of Patra                     | Icu                                                        | Achaia    |
| <b>GR</b>      | Vasiiios Zidianakis         | Agioi Anargiroi Hospital                      | General Icu                                                | Athens    |
| <b>GR</b>      | Vryza Konstantinia          | Theagenio                                     | Meth Theagenio                                             | Theassal  |
| <b>GR</b>      | Zoi Aidoni                  | University General Hospital Ahepa             | Metha                                                      | Thessalo  |

| <b>Ireland</b>     |                           |                                                |                                                   |              |
|--------------------|---------------------------|------------------------------------------------|---------------------------------------------------|--------------|
| <b>IE</b>          | Brian Marsh               | Mater Misericordiae University Hospital        | Department Of Critical Care Medicine              | Dublin       |
| <b>IE</b>          | Catherine Motherway       | University Hospital Limerick                   | Uhl Icu                                           | Limerick     |
| <b>IE</b>          | Chris Read                | University Hospital Galway                     | General Icu                                       | Galway       |
| <b>Italy</b>       |                           |                                                |                                                   |              |
| <b>IT</b>          | Andrea Neville Cracchiolo | Arnas Ospedale Civico De Christina Benfratelli | Terapia Intensiva Polivalente Con Trauma Center   | Palermo      |
| <b>IT</b>          | Aristide Morigi           | Istituto Ortopedico Rizzoli                    | Tipo                                              | Bologna      |
| <b>IT</b>          | Italo Calamai             | San Giuseppe                                   | Terapia Intensiva                                 | Empoli       |
| <b>IT</b>          | Stefania Brusa            | Humanitas Reseach Hospital                     | General Icu                                       | Milan        |
| <b>Libya</b>       |                           |                                                |                                                   |              |
| <b>LY</b>          | Wesal Ali Belkhair        | Tripoli Medical Center                         | Ccu                                               | Tripoli      |
| <b>Netherlands</b> |                           |                                                |                                                   |              |
| <b>NL</b>          | Alexander D. Cornet       | Medisch Spectrum Twente                        | Intensive Care Center                             | Enschede     |
| <b>NL</b>          | Lenneke Haas              | Diakonessenhuis Utrecht                        | Intensive Care                                    | Utrecht      |
| <b>NL</b>          | Oscar Hoiting             | Canisius Wilhelmina Ziekenhuis                 | C38                                               | Nijmegen     |
| <b>NL</b>          | Rik T. Gerritsen          | Medical Centre Leeuwarden                      | Department Of Intensive Care                      | Leeuwarden   |
| <b>Norway</b>      |                           |                                                |                                                   |              |
| <b>NO</b>          | Bente Jannestad           | Sykehuset Telemark                             | Intensiv Skien                                    | Skien        |
| <b>NO</b>          | Britt Sjøbøe              | Haukeland University Hospital                  | General Icu                                       | Bergen       |
| <b>NO</b>          | Eva Rice                  | Ålesund                                        | Medisinsk Intensiv                                | Ålesund      |
| <b>NO</b>          | Finn H. Andersen          | Ålesund Hospital                               | Dept. Anesthesia And Intensive Care, Surgical Icu | Ålesund      |
| <b>NO</b>          | Hans Frank Strietzel      | Kristiansund Sykehus Helse Møre Og Romsdal Hf  | Intensiv Kristiansund                             | Kristiansund |
| <b>NO</b>          | Jørund Langørgen          | Haukeland University Hospital                  | Medisinsk Intensiv Og Overvåkning (mio)           | Bergen       |
| <b>NO</b>          | Kirsti Tøien              | Oslo University Hospital                       | Intensive Care Section Ullevaal                   | Oslo         |

|                 |                            |                                                    |                                                           |           |
|-----------------|----------------------------|----------------------------------------------------|-----------------------------------------------------------|-----------|
| <b>NO</b>       | Kristian Strand            | Stavanger University Hospital                      | Department Of Intensive Care                              | Stavange  |
| <b>Poland</b>   |                            |                                                    |                                                           |           |
| <b>PO</b>       | Anna Kluzik                | Heliodor Swiecicki Clinical Hospital At The Karol  | Anaesthesiology Intensive Care And Pain Treatment         | Poznań    |
| <b>PO</b>       | Dariusz Maciejewski        | Regional Teaching Hospital                         | Department Of Anaesthesiology And Intensive Care          | Bielsko-b |
| <b>PO</b>       | Lukasz J. Krzych           | University Clinical Center Katowice                | Department Of Anaesthesiology And Intensive Care - School | Katowice  |
| <b>PO</b>       | Maciej Zukowski            | Teching Hospital No 2                              | Department Anaesthesiology Intensive Therapy And Acute    | Szczecin  |
| <b>PO</b>       | Małgorzata Lipińska-Gediga | 4th Military Hospital In Wrocław                   | Anesthesia And Intensive Care Unit                        | Wrocław   |
| <b>PO</b>       | Marta Serwa                | Central Clinical Hospital Ckd - University Medical | Anaesthesia And Intensive Care Clinic                     | Lodz      |
| <b>PO</b>       | Mirosław Czuczwar          | First Independent Teaching Hospital No. 1          | Ii Department Of Anesthesiology And Intensive Care        | Lublin    |
| <b>PO</b>       | Mirosław Ziętkiewicz       | Krakowski Szpital Specjalistyczny Im. Jana Pawła   | Thoracic Anaesthesia And Respiratory Icu                  | Kraków    |
| <b>PO</b>       | Natalia Kozera             | Wrocław Medical University                         | Department Of Anesthesiology And Intensive Therapy        | Wrocław   |
| <b>PO</b>       | Paweł Zatorski             | Infant Jesus Teaching Hospital                     | I Department Of Anaesthesiology And Intensive Care        | Warsaw    |
| <b>PO</b>       | Piotr Galkin               | Regional Hospital In Białystok                     | Department Of Anaesthesiology And Intensive Care          | Białystok |
| <b>Portugal</b> |                            |                                                    |                                                           |           |
| <b>PT</b>       | Ana Margarida Fernandes    | Hospital S. José, Chulc Epe                        | Uci Neurocríticos E Trauma                                | Lisboa    |
| <b>PT</b>       | Ana Rita Santos            | Hospital São Francisco Xavier                      | Unidade Cuidados Intensivos Polivalente                   | Lisbon    |
| <b>PT</b>       | Cristina Sousa             | Hospital Da Luz                                    | Uci Hospital Da Luz                                       | Lisboa    |
| <b>PT</b>       | Inês Barros                | Hospital De Viseu                                  | Ucip                                                      | Viseu     |
| <b>PT</b>       | Isabel Amorim Ferreira     | Hospital Professor Doutor Fernando Fonseca Epe     | Serviço De Medicina Intensiva Smi                         | Amadora   |
| <b>PT</b>       | Jacobo Bacariza Blanco     | Hospital Garcia De Orta - Hgo                      | Serviço De Medicina Intensiva                             | Almada    |
| <b>PT</b>       | Jose Maia                  | Centro Hospitalar De Trás Montes E Alto Douro      | Serviço De Medicina Intensiva                             | Vila Real |
| <b>PT</b>       | Nuno Catorze               | Chmt-abrantes                                      | Smi                                                       | Abrantes  |
| <b>Russian</b>  |                            |                                                    |                                                           |           |
| <b>RU</b>       | Vladislav Belskiy          | Privolzhskiy District Medical Center               | Department Of Anesthesiology And Intensive Care           | Nizhniy N |

| <b>Spain</b>       |                           |                                                |                                                    |            |
|--------------------|---------------------------|------------------------------------------------|----------------------------------------------------|------------|
| <b>ES</b>          | Africa Lores              | Hospital De Bellvitge                          | Uci                                                | Barcelona  |
| <b>ES</b>          | Catia Cilloniz            | Hospital Clinic Of Barcelona                   | Respiratory Intensive Care Unit                    | Barcelona  |
| <b>ES</b>          | David Perez-Torres        | Hospital Universitario Río Hortega             | Uvi Polivalente Y Coronaria                        | Valladolid |
| <b>ES</b>          | Emilio Maseda             | Universitario La Paz                           | Surgical Icu                                       | Madrid     |
| <b>ES</b>          | Enver Rodriguez           | General Universitario De Castellón             | Servicio De Medicina Intensiva                     | Castellón  |
| <b>ES</b>          | Estefania Prol-Silva      | Hospital Universitario Río Hortega             | Uvi Neurocríticos Trauma Y Quemados                | Valladolid |
| <b>ES</b>          | Gaspar Eixarch            | Hospital De Tortosa Verge De La Cinta          | Servei De Medicina Intensiva                       | Tortosa    |
| <b>ES</b>          | Gerardo Aguilar           | Clínico Universitario De Valencia              | Surgical Intensive Care Unit                       | Valencia   |
| <b>ES</b>          | Marián Irazábal Jaimes    | Hospital General De Catalunya                  | Hgc                                                | Barcelona  |
| <b>ES</b>          | Mercedes Ibarz Villamayor | Hospital Universitario Sagrado Corazon         | Intensive Care Unit                                | Barcelona  |
| <b>ES</b>          | Patricia Jimeno Cubero    | Complejo Hospitalario De Segovia               | Icu Segovia                                        | Segovia    |
| <b>ES</b>          | Teresa Tomasa             | Germans Trias I Pujol Hospital                 | General Icu                                        | Badalona   |
| <b>Sweden</b>      |                           |                                                |                                                    |            |
| <b>SE</b>          | Camilla Brorsson          | Umeå University                                | Department Of Surgical And Perioperative Sciences, | Umeå       |
| <b>SE</b>          | Jessica Nauska            | Blekingesjukhuset                              | Intensivvårdsavdelning 31                          | Karlskrona |
| <b>SE</b>          | Joakim Sivik              | Alingsås Lasarett                              | Intensivvårdsavdelningen                           | Alingsås   |
| <b>SE</b>          | Lina De Geer              | Linköping University Hospital                  | Icu Linköping                                      | Linköping  |
| <b>SE</b>          | Sten Walther              | Linköping University Hospital                  | Cardiothoracic Intensive Care Unit                 | Linköping  |
| <b>Switzerland</b> |                           |                                                |                                                    |            |
| <b>CH</b>          | Filippo Boroli            | Hopitaux Universitaires De Genève              | Adult Intensive Care Unit                          | Geneva     |
| <b>CH</b>          | Joerg C. Schefold         | University Of Bern Inselspital                 | Department Of Intensive Care Medicine              | Bern       |
| <b>Turkey</b>      |                           |                                                |                                                    |            |
| <b>TR</b>          | Ismail Yıldız             | Ordu University Training And Research Hospital | General Icu                                        | Ordu       |

**Ukraine**

|           |               |                                             |                                   |         |
|-----------|---------------|---------------------------------------------|-----------------------------------|---------|
| <b>UA</b> | Ihor Yovenko  | Dnipro Mechnikov Regional Clinical Hospital | Intensive Care Unit Of Polytrauma | Dnipro  |
| <b>UA</b> | Yuriy Nalapko | European Wellness Academy, Luhansk Regional | Icu 1                             | Lugansk |
| <b>UA</b> | Yuriy Nalapko | European Wellness Academy, Luhansk Regional | Icu 2                             | Lugansk |

**Wales (GB)**

|           |              |                     |               |         |
|-----------|--------------|---------------------|---------------|---------|
| <b>WL</b> | Richard Pugh | Glan Clwyd Hospital | Critical Care | Bodelwy |
|-----------|--------------|---------------------|---------------|---------|
